# Supplementary material for: MRI-Based Radiomics Analysis for Intraoperative Risk Assessment in Gravid Patients at High Risk with Placenta Accreta Spectrum
Source: MDPI journal article supplement (doi:10.3390/diagnostics12020485), 2022-02-14
Supplement: s1 [file s1]

Supplementary Figure S1: Selection of Radiomics features using the least absolute shrinkage and selection (LASSO) regression for predicting removal protocols of the placenta (A) and intraoperative blood loss (B).
